# Supplementary material for: Impact and Sustainability of Antibiotic Stewardship in Pediatric Emergency Departments: Why Persistence Is the Key to Success
Source: PubMed Central journal article supplement (PMC7761799; doi:10.3390/antibiotics9120867), 2020-12-04
Supplement: antibiotics-09-00867-s001.pdf [file antibiotics-09-00867-s001.pdf]

## Supplementary material

Article

# Impact and Sustainability of Antibiotic Stewardship in Pediatric Emergency Departments: Why Persistence Is the Key to Success

Elisa Barbieri <sup>1,\*</sup>, Maia De Luca <sup>2</sup>, Marta Minute <sup>3</sup>, Carmen D'Amore <sup>4</sup>, Marta Luisa Ciofi Degli Atti <sup>4</sup>, Stefano Martellosi <sup>3</sup>, Carlo Giaquinto <sup>1</sup>, Liviana Da Dalt <sup>5</sup>, Theoklis Zaoutis <sup>6</sup> and Daniele Dona <sup>1</sup>

<sup>1</sup> Division of Pediatric Infectious Diseases, Department of Women's and Children's Health, University of Padova, 35131 Padova, Italy; carlo.giaquinto@unipd.it (C.G.); daniele.dona@unipd.it (D.D.)

<sup>2</sup> Unit of Immune and Infectious Diseases, Academic Department of Pediatrics, Bambino Gesù Children's Hospital, IRCCS, 00165 Rome, Italy; maiadeluca@opbg.net

<sup>3</sup> Pediatric Unit, Ca' Foncello's Hospital, 31100 Treviso, Italy; marta.minute@aulss2.veneto.it (M.M.); stefano.martellosi@aulss2.veneto.it (S.M.)

<sup>4</sup> Unit of Clinical Epidemiology, Bambino Gesù Children's Hospital, IRCCS, 00165 Rome, Italy; carmen.damore@opbg.net (C.D.); marta.ciofidegliatti@opbg.net (M.L.C.D.A.)

<sup>5</sup> Pediatric Emergency Department, Department of Women's and Children's Health, University Hospital of Padua, 2-35128 Padova, Italy; liviana.dadalt@unipd.it

<sup>6</sup> Division of Infectious Diseases and the Center for Pediatric Clinical Effectiveness, Children's Hospital of Philadelphia, Philadelphia, PA 19104, USA; zaoutis@email.chop.edu

\* Correspondence: elisa.barbieri.5@phd.unipd.it

## Tables

1. Table S1 Missing data in the different periods in the three Centers (A, B, C).
2. Table S2 Demographic characteristics of included and excluded patients with pharyngitis and AOM in the different periods in the three Centers (A, B, C).
3. Table S3 Treatment option for non-complicated AOM in the different periods in the three Centers (A, B, C).

## Figures

1. Figure S1 Distribution of amoxicillin dosage for pharyngitis among different periods in Centre A and B with pairwise comparison.
2. Figure S2 Distribution of days of therapy for pharyngitis among different periods in the three Centers (A, B, C) with pairwise comparison.
3. Figure S3 Distribution of co-amoxiclav (A, B) and amoxicillin (C, D) dosage for acute otitis media among different periods in Centre A (A, C) and Centre B (B, D) with pairwise comparison.
4. Figure S4 Distribution of co-amoxiclav (A, B) and amoxicillin (C, D) dosage for non-complicated acute otitis media among different periods in Centre A (A, C) and Centre B (B, D) with pairwise comparison.
5. Figure S5 Distribution of days of therapy (DOT) for acute otitis media in the different periods in Centre A (A, D), Centre B (B, E) and Centre C (C, F) stratified by age class (< 24 months: A, B, C; ≥ 24 months: D, E, F) with pair wise comparison.

Tables

Table S1. Missing data in the different periods in the three Centers (A, B, C).

| Outcome                             | Centre A |        |        |                | Centre B         |                |             | Centre C       |                |                |                |
|-------------------------------------|----------|--------|--------|----------------|------------------|----------------|-------------|----------------|----------------|----------------|----------------|
|                                     | Pre      | Post 1 | Post 2 | Post 3         | Pre              | Post 1         | Post 2      | Pre            | Post 1         | Post 2         | Post 3         |
| <b>GAS pharyngitis episode</b>      |          |        |        |                |                  |                |             |                |                |                |                |
| Amoxicillin dosage, N(%)            | /        | /      | /      | /              | 2/108 (1·9)      | 2/97 (2·1)     | 4/114 (3·5) |                |                |                |                |
| DOT, N (%)                          | /        | /      | /      | /              | 29/155<br>(18·7) | /              | 4/129 (3·1) | 3/340<br>(0·9) | 4/202<br>(2·0) | 1/272<br>(0·4) | 4/296<br>(1·4) |
| <b>AOM episodes</b>                 |          |        |        |                |                  |                |             |                |                |                |                |
| Amoxicillin dosage, N(%)            | /        | /      | /      | 2/109<br>(1·8) | 2/56 (4)         | 6/66 (9)       | 4/97 (4)    | /              | /              | /              | /              |
| Co-amoxiclav dosage, N(%)           | /        | /      | /      | 1/62 (1·6)     | 4/44 (9)         | 1/22 (4)       | 1/34 (3)    | /              | /              | /              | /              |
| DOT, N (%)                          |          |        |        |                |                  |                |             |                |                |                |                |
| 2-23 months                         | /        | /      | /      | 1/68 (1·5)     | 9/52 (17·3)      | /              | 1/68 (1·5)  | 3/75<br>(4·0)  | 1/89 (1·1)     | /              | 2/133<br>(1·5) |
| 2-14 years                          | /        | /      | /      | 3/108<br>(2·8) | 11/77 (14·3)     | /              | /           | 7/169<br>(4·1) | 3/129<br>(2·3) | /              | 5/282<br>(1·8) |
| <b>Non-complicated AOM episodes</b> |          |        |        |                |                  |                |             |                |                |                |                |
| Amoxicillin dosage, N(%)            | /        | /      | /      | 3/78 (3·8)     | 2/56 (3·6)       | 6/60<br>(10·0) | 4/93 (4·3)  | /              | /              | /              | /              |
| Co-amoxiclav dosage, N(%)           | /        | /      | /      | /              | 4/41 (9·8)       | 1/19 (5·3)     | 1/26 (3·8)  | /              | /              | /              | /              |
| DOT, N (%)                          |          |        |        |                |                  |                |             |                |                |                |                |
| 2-23 months                         | /        | /      | /      | 1/49 (2·0)     | 9/50 (18·0)      | /              | 1/65 (1·5)  | 2/44<br>(4·5)  | 1/64 (1·6)     | /              | 1/91 (1·1)     |
| 2-14 years                          | /        | /      | /      | 2/80 (2·5)     | 11/73 (15·1)     | /              | /           | 6/103<br>(5·8) | 3/78 (3·8)     | /              | 3/194<br>(1·5) |

**Table S2** Demographic characteristics of included and excluded patients with pharyngitis and AOM in the different periods in the three Centers (A, B, C).

|                                                          | Pre        |           | Post 1     |           | Post 2     |           | Post 3     |           | p value <sup>a</sup> |
|----------------------------------------------------------|------------|-----------|------------|-----------|------------|-----------|------------|-----------|----------------------|
|                                                          | I          | E         | I          | E         | I          | E         | I          | E         |                      |
| <b>Centre A</b>                                          |            |           |            |           |            |           |            |           |                      |
| Pharyngitis episodes, N                                  | 281        | 49        | 273        | 64        | 299        | 68        | 267        | 92        |                      |
| Sex, Male, N(%)                                          | 165 (58.7) | 27 (55.1) | 154 (56.4) | 35 (54.7) | 156 (52.2) | 42 (61.8) | 150 (56.2) | 52 (56.5) | 0.454                |
| Age class, 2-23 months, N (%)                            | 96 (34.2)  | 15 (30.6) | 78 (28.6)  | 13 (20.3) | 86 (28.8)  | 32 (47.1) | 77 (28.8)  | 22 (23.9) | 0.397                |
| Presence of otorrhea, N (%)                              | 44 (15.7)  |           | 60 (22.0)  |           | 69 (23.1)  |           | 49 (18.4)  |           | 0.101                |
| Ongoing antibiotic therapy, N (%)                        |            | 24 (49.0) |            | 17 (26.6) |            | 34 (50.0) |            | 29 (31.5) |                      |
| Exclusion criteria                                       |            |           |            |           |            |           |            |           |                      |
| Chemotherapy, wound care or attend a hemodialysis clinic |            | /         |            | 2 (4.55)  |            | /         |            | 1 (1.28)  |                      |
| Chronic otitis media                                     |            | 11 (22.4) |            | 20 (31.3) |            | 6 (8.8)   |            | 46 (50.0) |                      |
| Concomitant diseases                                     |            | /         |            | 1 (1.6)   |            | 17 (25.0) |            | 9 (9.8)   |                      |
| Craniofacial abnormalities                               |            | /         |            | 13 (20.3) |            | 9 (13.3)  |            | 9 (9.8)   |                      |
| Diabetes                                                 |            | /         |            | 1 (1.6)   |            | /         |            | /         |                      |
| Essudative otitis                                        |            | 3 (6.1)   |            | 1 (1.6)   |            | 9 (13.3)  |            | 2 (2.2)   |                      |
| Immunodeficiency or immunosuppressive therapy            |            | /         |            | 2 (3.5)   |            | 4 (5.9)   |            | 1 (1.1)   |                      |
| Patient hospitalized                                     |            | /         |            | /         |            | 2 (2.9)   |            | 1 (1.1)   |                      |
| Systemic antibiotic therapy, intravenous                 |            | 5 (10.2)  |            | 1 (1.6)   |            | 2 (2.9)   |            | 3 (3.3)   |                      |
| Tympanostomy tubes at the time of diagnosis              |            | /         |            | 1 (1.6)   |            | 1 (1.5)   |            | 1 (1.1)   |                      |
| <hr/>                                                    |            |           |            |           |            |           |            |           |                      |
| Acute otitis media episodes, N                           | 298        | 89        | 364        | 80        | 326        | 90        | 264        | 49        |                      |
| Sex, Male, N(%)                                          | 168 (56.4) | 57 (64.0) | 212 (58.2) | 41 (51.2) | 172 (52.8) | 54 (60.0) | 134 (50.8) | 30 (61.2) | 0.228                |
| Age class, 2-35 months, N (%)                            | 100 (33.6) | 29 (32.6) | 135 (37.1) | 29 (36.2) | 83 (25.5)  | 32 (35.6) | 73 (27.7)  | 14 (28.6) | 0.004                |
| Ongoing antibiotic therapy, N (%)                        |            | 52 (58.4) |            | 40 (50.0) |            | 51 (56.7) |            | 35 (71.4) |                      |
| Exclusion criteria                                       |            |           |            |           |            |           |            |           |                      |
| Chronic diseases                                         |            | 3 (3.4)   |            | 4 (5.0)   |            | 1 (1.1)   |            | 2 (4.1)   |                      |
| Complicated disease                                      |            | 1 (1.1)   |            |           |            |           |            | 5 (10.2)  |                      |
| Concomitant diseases                                     |            | 23 (25.8) |            | 23 (28.8) |            | 21 (23.3) |            | 5 (10.2)  |                      |
| Immunodeficiency or immunosuppressive therapy            |            | 1 (1.1)   |            |           |            |           |            | 2 (4.1)   |                      |
| Patient hospitalized                                     |            |           |            |           |            | 11 (12.2) |            | 4 (8.2)   |                      |
| PFAPA <sup>b</sup>                                       |            | 1 (1.1)   |            | 2 (2.5)   |            | 3 (3.3)   |            | 1 (2.0)   |                      |
| Previous tonsillectomy                                   |            | 2 (2.2)   |            | 3 (3.8)   |            | 2 (2.2)   |            | 1 (2.0)   |                      |
| Systemic antibiotic therapy, intravenous                 |            |           |            |           |            |           |            |           |                      |

**Centre B**

Pharyngitis episodes, N 139 28 105 11 151 15

|                                                           |                         |           |                         |           |            |           |                         |           |       |
|-----------------------------------------------------------|-------------------------|-----------|-------------------------|-----------|------------|-----------|-------------------------|-----------|-------|
| Sex, Male, N(%)                                           | 71 (51.1)               | 14 (50.0) | 62 (59.0)               | 7 (63.6)  | 75 (49.7)  | 10 (66.7) |                         |           | 0.662 |
| Age class, 2-23 months, N (%)                             | 56 (40.3)               | 9 (32.1)  | 40 (38.1)               | 2 (18.2)  | 68 (45.0)  | 4 (26.7)  |                         |           | 0.027 |
| Presence of otorrhea, N (%)                               | 7 (5.0)                 |           | 11 (10.5)               |           | 14 (9.3)   |           |                         |           | 0.243 |
| Ongoing antibiotic therapy, N (%)                         |                         | 25 (89.3) |                         | 9 (81.8)  |            | 13 (86.7) |                         |           |       |
| Exclusion criteria                                        |                         |           |                         |           |            |           |                         |           |       |
| Chemotherapy, wound care or attend a hemodialysis clinic  |                         | /         |                         | /         |            | /         |                         |           |       |
| Chronic otitis media                                      |                         | /         |                         | 2 (18.2)  |            | /         |                         |           |       |
| Concomitant diseases                                      |                         | 1 (3.6)   |                         | /         |            | /         |                         |           |       |
| Craniofacial abnormalities                                |                         | 2 (7.1)   |                         | /         |            | /         |                         |           |       |
| Diabetes                                                  |                         | /         |                         | /         |            | /         |                         |           |       |
| Essudative otitis                                         |                         | /         |                         | 1 (9.1)   |            | 1 (6.7)   |                         |           |       |
| Immunodeficiency or immunosuppressive therapy             |                         | /         |                         | /         |            | /         |                         |           |       |
| Patient hospitalized                                      |                         | 1 (3.6)   |                         | /         |            | /         |                         |           |       |
| Systemic antibiotic therapy, intravenous                  |                         | 1 (3.6)   |                         | /         |            | 1 (6.7)   |                         |           |       |
| Tympanostomy tubes at the time of diagnosis               |                         | /         |                         | /         |            | /         |                         |           |       |
| <hr/>                                                     |                         |           |                         |           |            |           |                         |           |       |
| Acute otitis media episodes, N                            | 290                     | 65        | 241                     | 31        | 251        | 43        |                         |           |       |
| Sex, Male, N(%)                                           | 168 (57.9)              | 37 (56.9) | 131 (54.4)              | 19 (61.3) | 145 (57.8) | 24 (55.8) |                         |           | 0.659 |
| Age class, 2-35 months, N (%)                             | 124 (42.8)              | 18 (27.7) | 92 (38.2)               | 7 (22.6)  | 92 (36.7)  | 7 (16.3)  |                         |           | 0.314 |
| Ongoing antibiotic therapy, N (%)                         |                         | 60 (92.3) |                         | 24 (77.4) |            | 38 (88.4) |                         |           |       |
| Exclusion criteria                                        |                         |           |                         |           |            |           |                         |           |       |
| Chronic diseases                                          |                         | 2 (3.1)   |                         |           |            |           |                         |           |       |
| Complicated disease                                       |                         | 3 (4.6)   |                         | 1 (3.2)   |            |           |                         |           |       |
| Concomitant diseases                                      |                         |           |                         | 3 (9.7)   |            | 3 (7.0)   |                         |           |       |
| Immunodeficiency or immunosuppressive therapy             |                         | 2 (3.1)   |                         | 2 (6.5)   |            |           |                         |           |       |
| Patient hospitalized                                      |                         |           |                         |           |            |           |                         |           |       |
| PFAPA <sup>b</sup>                                        |                         |           |                         |           |            |           |                         |           |       |
| Previous tonsillectomy                                    |                         |           |                         |           |            | 1 (2.3)   |                         |           |       |
| Systemic antibiotic therapy, intravenous                  |                         |           |                         |           |            | 1 (2.3)   |                         |           |       |
| <hr/>                                                     |                         |           |                         |           |            |           |                         |           |       |
| <b>Centre C</b>                                           |                         |           |                         |           |            |           |                         |           |       |
| Pharyngitis episodes, N                                   | 302                     | 159       | 324                     | 163       | 387        | 173       | 481                     | 149       |       |
| Sex, Male, N(%)                                           | 156 (51.7) <sup>c</sup> | 83 (52.2) | 177 <sup>c</sup> (54.6) | 75 (46.0) | 212 (54.8) | 95 (54.9) | 269 (55.9) <sup>c</sup> | 72 (48.3) | 0.705 |
| Age class, 2-23 months, N (%)                             | 85 (28.1)               | 51 (32.1) | 109 (33.6)              | 59 (36.2) | 146 (37.7) | 50 (28.9) | 146 (30.4)              | 49 (32.9) | 0.035 |
| Presence of otorrhea, N (%)                               | 108 (35.8)              |           | 87 (26.9)               |           | 116 (30.0) |           | 134 (27.9)              |           | 0.068 |
| Ongoing antibiotic therapy, N (%)                         |                         | 67 (42.1) |                         | 67 (41.1) |            | 85 (49.1) |                         | 58 (38.9) |       |
| Exclusion criteria                                        |                         |           |                         |           |            |           |                         |           |       |
| Chemotherapy, wound care or attend a haemodialysis clinic |                         | /         |                         | /         |            | 1 (0.69)  |                         | /         |       |
| Chronic otitis media                                      |                         | 1 (0.6)   |                         | 3 (1.8)   |            | 5 (2.9)   |                         | 3 (2.0)   |       |

|                                               |            |            |            |            |            |            |            |            |       |
|-----------------------------------------------|------------|------------|------------|------------|------------|------------|------------|------------|-------|
| Concomitant diseases                          | 36 (22.6)  | 26 (16.0)  | 71 (41.0)  | 26 (17.4)  |            |            |            |            |       |
| Craniofacial abnormalities                    | 13 (8.2)   | 1 (0.6)    | 1 (0.69)   | 3 (2.0)    |            |            |            |            |       |
| Diabetes                                      | /          | /          | /          | /          |            |            |            |            |       |
| Essudative otitis                             | 3 (1.9)    | 8 (4.9)    | 6 (3.5)    | 3 (2.0)    |            |            |            |            |       |
| Immunodeficiency or immunosuppressive therapy | 5 (3.1)    | 3 (1.8)    | 1 (0.6)    | 2 (1.3)    |            |            |            |            |       |
| Patient hospitalized                          | /          | /          | /          | /          |            |            |            |            |       |
| Systemic antibiotic therapy, intravenous      | 89 (56.0)  | 97 (59.5)  | 15 (10.34) | 19 (20.88) |            |            |            |            |       |
| Tympanostomy tubes at the time of diagnosis   | 9 (5.7)    | 8 (4.9)    | 3 (1.7)    | 3 (2.0)    |            |            |            |            |       |
| Acute otitis media episodes, N                | 363        | 248        | 217        | 208        | 316        | 164        | 319        | 218        |       |
| Sex, Male, N(%)                               | 199 (54.8) | 154 (62.1) | 113 (52.1) | 120 (57.7) | 193 (61.1) | 104 (63.4) | 168 (52.7) | 117 (53.7) | 0.118 |
| Age class, 2-35 months, N (%)                 | 195 (53.7) | 112 (45.2) | 105 (48.4) | 87 (41.8)  | 149 (47.2) | 63 (38.4)  | 124 (38.9) | 80 (36.7)  | 0.002 |
| Ongoing antibiotic therapy, N (%)             |            | 239 (96.4) |            | 139 (66.8) |            | 159 (97.0) |            | 167 (76.6) |       |
| Exclusion criteria                            |            |            |            |            |            |            |            |            |       |
| Chronic diseases                              |            | 1 (0.4)    |            | 7 (3.4)    |            |            |            | 5 (2.3)    |       |
| Complicated disease                           |            |            |            | 12 (5.8)   |            |            |            | 2 (0.9)    |       |
| Concomitant diseases                          |            | 5 (2.0)    |            | 8 (3.8)    |            | 1 (0.6)    |            | 14 (6.4)   |       |
| Immunodeficiency or immunosuppressive therapy |            | 2 (0.8)    |            |            |            | 1 (0.6)    |            | 2 (0.9)    |       |
| Patient hospitalized                          |            | 1 (0.4)    |            |            |            | 3 (1.8)    |            | 6 (2.8)    |       |
| PFAPA <sup>b</sup>                            |            |            |            | 2 (1.0)    |            |            |            | 7 (9.6)    |       |
| Previous tonsillectomy                        |            | 34 (13.7)  |            | 36 (17.3)  |            | 43 (26.2)  |            | 27 (12.3)  |       |
| Systemic antibiotic therapy, intravenous      |            |            |            |            |            |            |            |            |       |

I=Included cases, E= Excluded cases.

<sup>a</sup> included cases only, <sup>b</sup> Periodic fever, aphthous stomatitis, pharyngitis and adenitis syndrome, <sup>c</sup> Missing data = 1/302 (0.3%), 4/324 (1.2%), 1/481 (0.2%).

**Table S3.** Treatment option for non-complicated AOM in the different periods in the three Centers (A, B, C).

|                             | Centre A      |               |               |               |         | Centre B      |              |               |         | Centre C      |               |               |               | P value |
|-----------------------------|---------------|---------------|---------------|---------------|---------|---------------|--------------|---------------|---------|---------------|---------------|---------------|---------------|---------|
|                             | Pre           | Post 1        | Post 2        | Post 3        | P value | Pre           | Post 1       | Post 2        | P value | Pre           | Post 1        | Post 2        | Post 3        |         |
| N. of episodes              | 236           | 213           | 230           | 218           |         | 132           | 94           | 137           |         | 194           | 237           | 271           | 347           |         |
| Wait and see, N (%)         | 58<br>(24.5)  | 89<br>(41.8)  | 83<br>(36.1)  | 89<br>(40.8)  | <0.0    | 9 (6.8)       | 10<br>(10.6) | 5 (3.6)       | 0.10    | 47<br>(24.2)  | 95<br>(40.1)  | 66<br>(24.4)  | 62<br>(17.9)  | <0.0    |
| Antibiotic treatment, N (%) | 179<br>(75.5) | 124<br>(58.2) | 147<br>(63.9) | 129<br>(59.2) | 01      | 123<br>(93.2) | 84<br>(89.4) | 132<br>(96.4) | 9       | 147<br>(75.8) | 142<br>(59.9) | 205<br>(75.6) | 285<br>(82.1) | 01      |

|                                                 |                |                |                |               |            |                |                |                |            |               |              |               |               |            |
|-------------------------------------------------|----------------|----------------|----------------|---------------|------------|----------------|----------------|----------------|------------|---------------|--------------|---------------|---------------|------------|
| Amoxicillin, N (%)                              | 68<br>(38.0)   | 80<br>(64.5)   | 106<br>(72.1)  | 101<br>(78.3) | <0.0<br>01 | 56<br>(45.5)   | 60<br>(71.4)   | 93<br>(70.5)   | <0.0<br>01 | 22<br>(15.0)  | 55<br>(38.7) | 40<br>(19.5)  | 49<br>(17.2)  | <0.0<br>01 |
| Broad spectrum, N(%)                            | 111<br>(62.0)  | 44<br>(35.5)   | 41<br>(27.9)   | 28<br>(21.7)  |            | 67<br>(54.5)   | 24<br>(28.6)   | 39<br>(29.5)   |            | 125<br>(85.0) | 87<br>(61.3) | 165<br>(80.5) | 236<br>(82.8) |            |
| Co-amoxiclav, N(%)                              | 78<br>(43.6)   | 33<br>(26.6)   | 34<br>(23.1)   | 24<br>(18.6)  | <0.0<br>01 | 41<br>(33.3)   | 19<br>(22.6)   | 26<br>(19.7)   | 0.03<br>5  | 98<br>(66.7)  | 74<br>(52.1) | 122<br>(59.5) | 199<br>(69.8) | 0.00<br>2  |
| Cephalosporins, N(%)                            | 29<br>(16.2)   | 8 (6.5)        | 6 (4.1)        | 4 (3.1)       | <0.0<br>01 | 25<br>(20.3)   | 4 (4.8)        | 13 (9.8)       | 0.00<br>2  | 23<br>(15.6)  | 11 (7.7)     | 39<br>(19.0)  | 34<br>(11.9)  | 0.01<br>6  |
| Macrolides, N(%)                                | 4 (2.2)        | 3 (2.4)        | /              | /             | 0.05<br>6  | 1 (0.8)        | 1 (1.2)        | /              | 0.52       | 4 (2.7)       | 2 (1.4)      | 4 (2.0)       | 3 (1.1)       | 5667       |
| Fluoroquinolones, N(%)                          | /              | /              | 1 (0.7)        | /             |            | /              | /              | /              |            | /             | /            | /             | /             |            |
| Amoxicillin dosage, Median [IQR],<br>mg/kg/die  | 50.0<br>[10.0] | 75.0<br>[25.0] | 75.0<br>[3.7]  | 75.0<br>[0.0] | <0.0<br>01 | 57.6<br>[14.3] | 73.0<br>[9.1]  | 75.0<br>[6.9]  | <0.0<br>01 | /             | /            | /             | /             |            |
| Co-amoxiclav dosage, Median<br>[IQR], mg/kg/die | 50.0<br>[10.0] | 75.0<br>[25.0] | 72.0<br>[14.8] | 75.0<br>[5.0] | <0.0<br>01 | 56.1<br>[8.1]  | 62.1<br>[23.7] | 68.6<br>[15.0] | <0.0<br>01 | /             | /            | /             | /             |            |
| DOT, Median [IQR], 2-23 months                  | 8.0<br>[2.3]   | 10.0<br>[2.0]  | 10.0<br>[0.0]  | 10.0<br>[0.0] | <0.0<br>01 | 10.0<br>[2.0]  | 10.0<br>[0.0]  | 10.0<br>[2.0]  | 0.12<br>2  | 7.0<br>[1.0]  | 7.0<br>[2.0] | 7.0<br>[1.0]  | 7.0<br>[1.0]  | 0.47<br>2  |
| DOT, Median [IQR], ≥ 24 months                  | 8.0<br>[1.5]   | 7.0<br>[3.0]   | 7.0<br>[3.0]   | 5.0<br>[2.0]  | <0.0<br>01 | 10.0<br>[2.0]  | 7.0<br>[2.8]   | 8.0<br>[5.0]   | <0.0<br>01 | 7.0<br>[1.0]  | 7.0<br>[1.0] | 7.0<br>[1.0]  | 7.0<br>[1.0]  | 0.23<br>8  |

# Figures

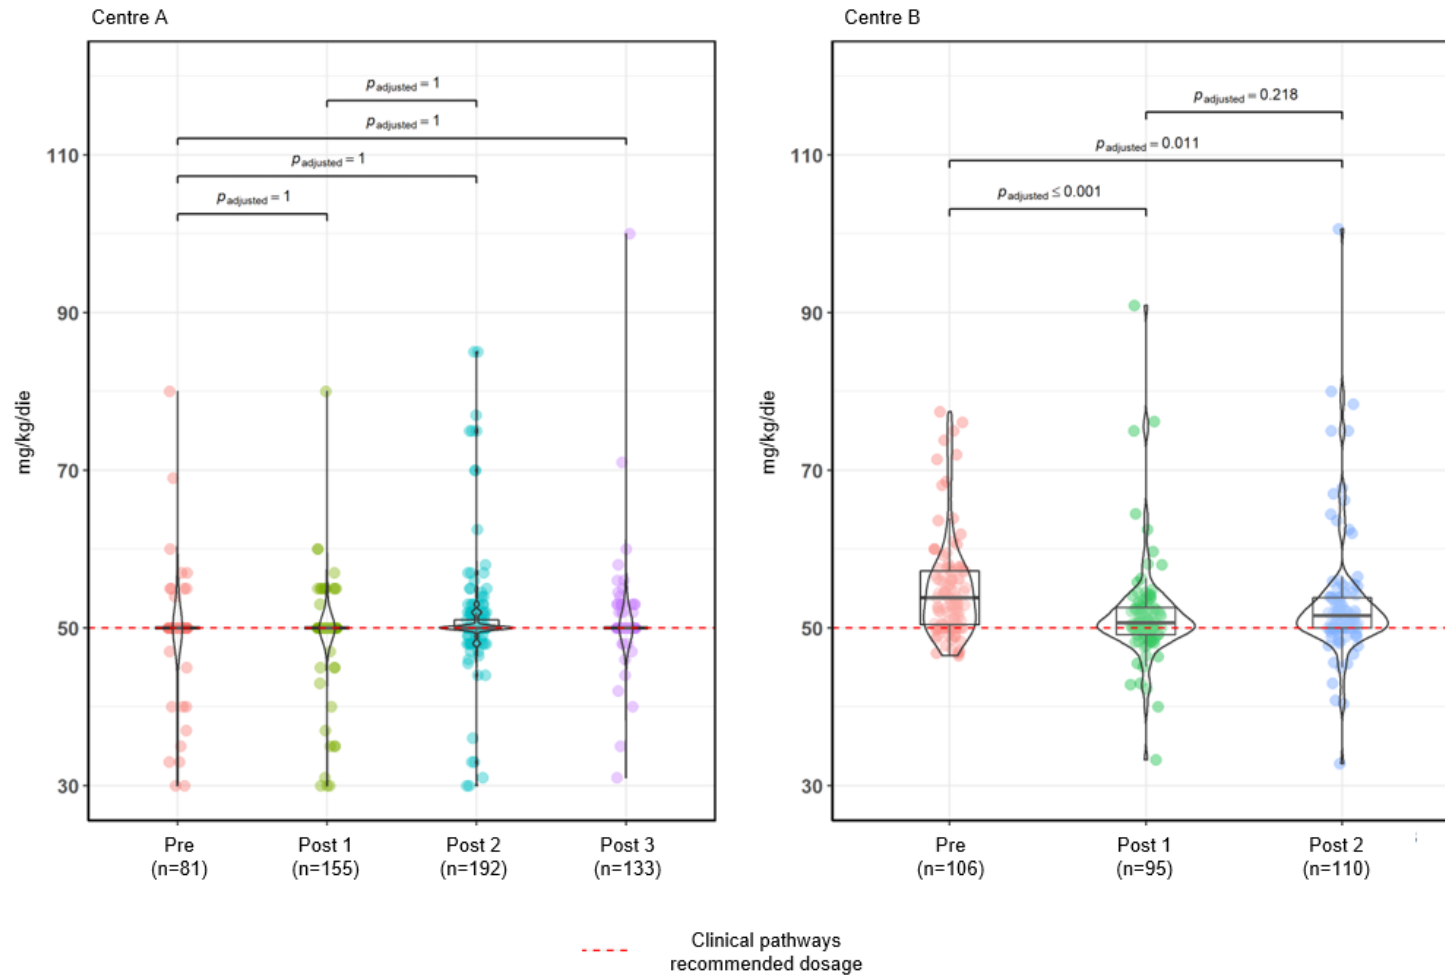

**Figure S1.** Distribution of amoxicillin dosage for pharyngitis among different periods in Centre A and B with pairwise comparison. The dots represent the granular data, horizontal lines are median and IQR; whiskers extend to the minimum and maximum within 1.5 times the IQR. Violin plots present quantifications. The dotted red line represents the clinical pathways recommended dosage (50 mg/kg/die).

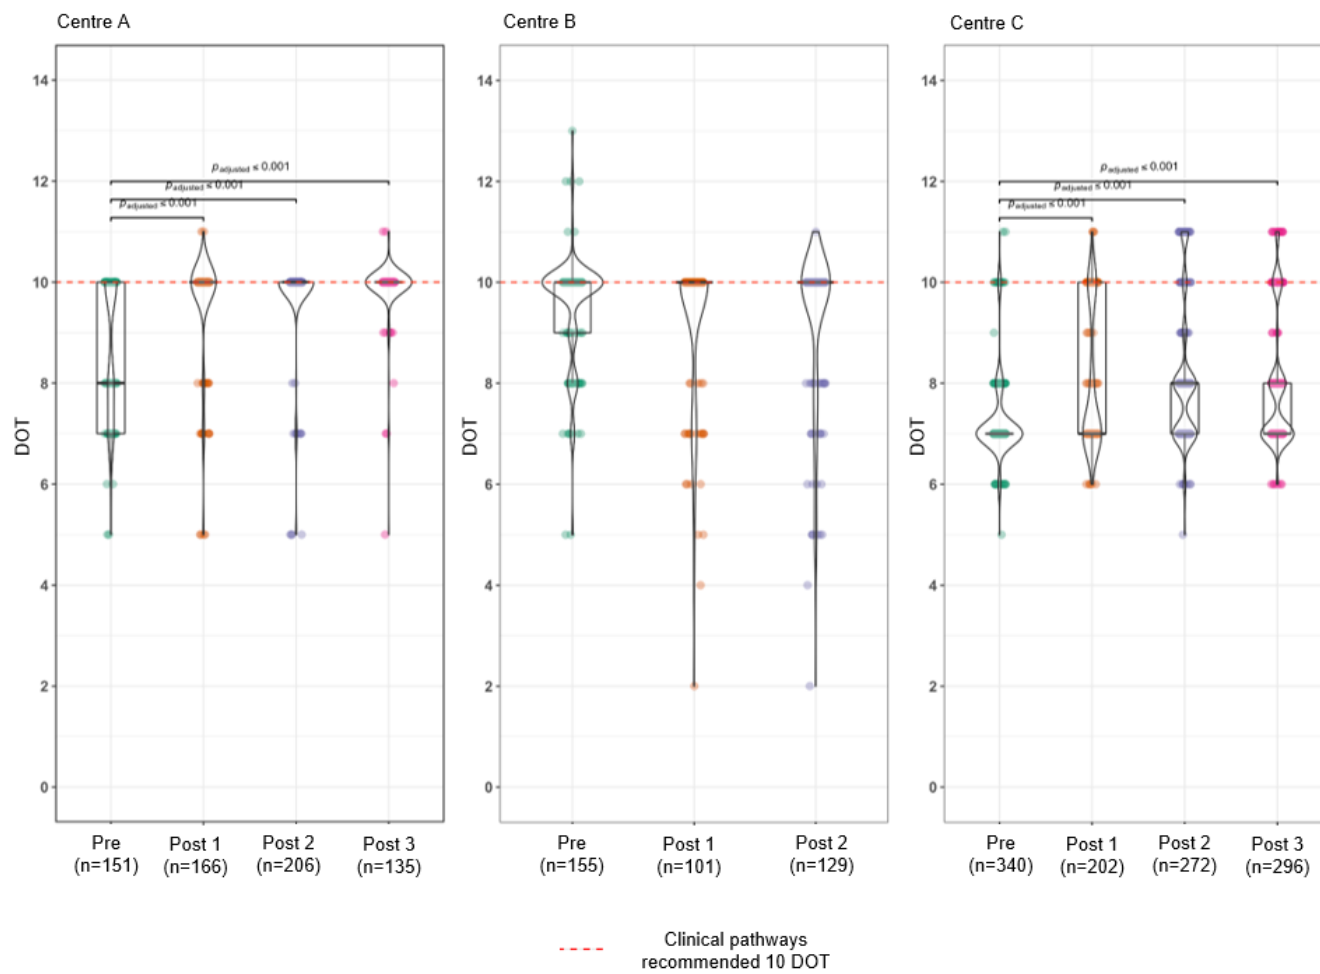

**Figure S2** Distribution of days of therapy for pharyngitis among different periods in the three Centers (A, B, C) with pairwise comparison. The dots represent the granular data, horizontal lines are median and IQR; whiskers extend to the minimum and maximum within 1.5 times the IQR. Violin plots present quantifications. The dotted red line represents the clinical pathways recommended 10 DOT.



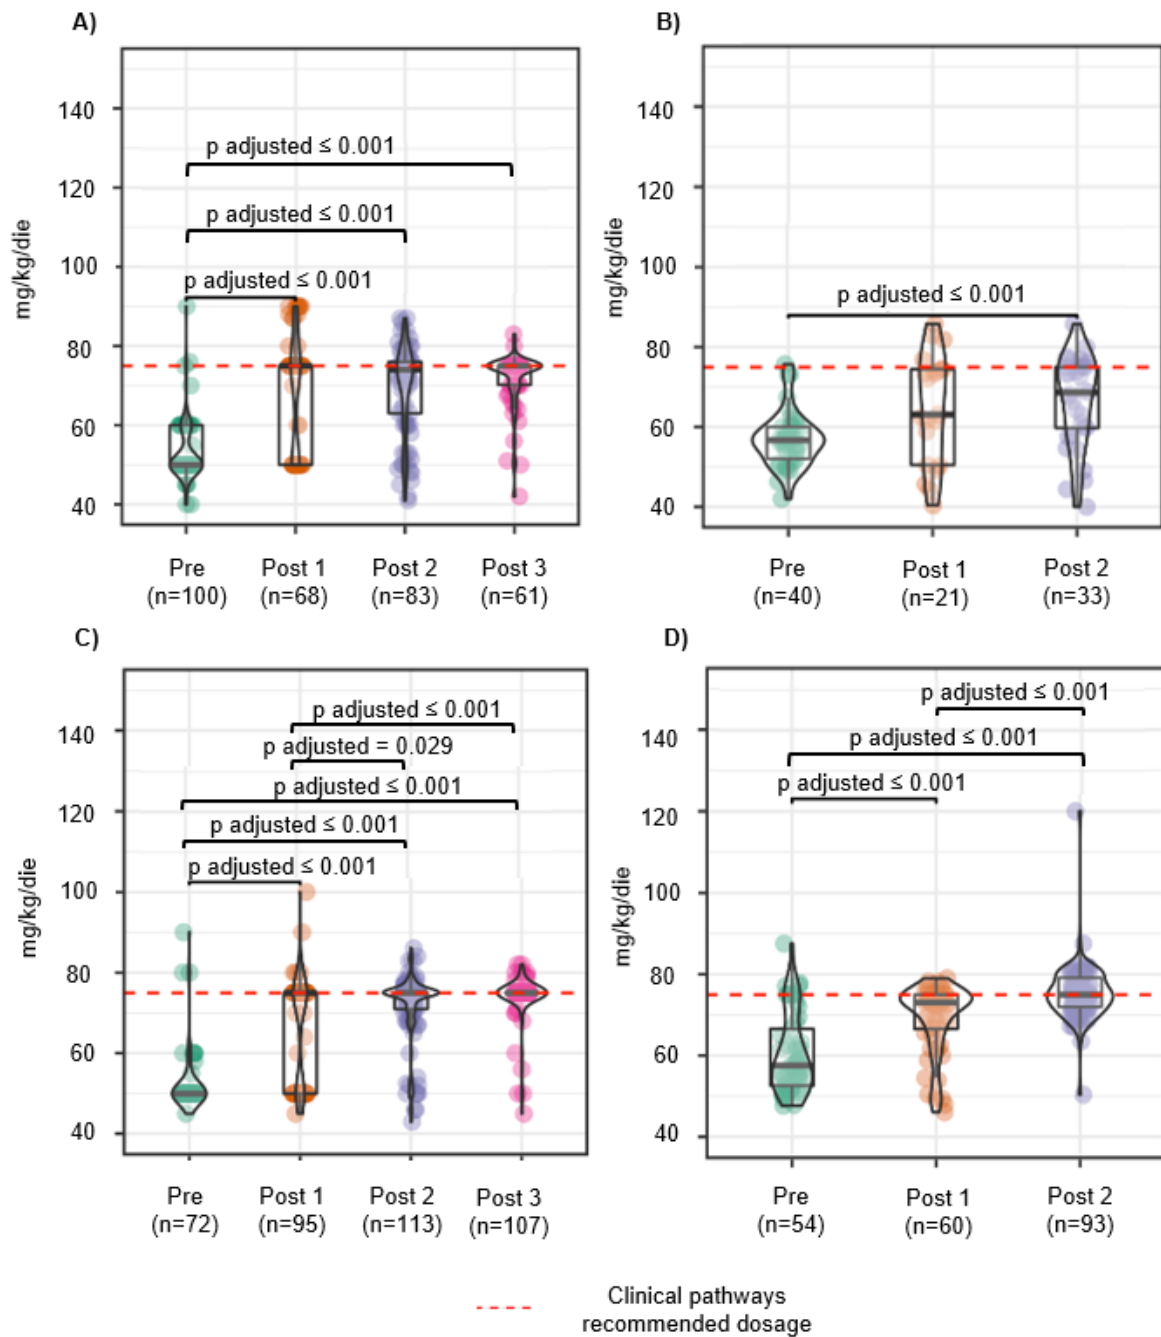

**Figure S3.** Distribution of co-amoxiclav (A, B) and amoxicillin (C, D) dosage for acute otitis media among different periods in Centre A (A, C) and Centre B (B, D) with pairwise comparison. The dots represent the granular data, horizontal lines are median and IQR; whiskers extend to the minimum and maximum within 1.5 times the IQR. Violin plots present quantifications. The dotted red line represents the clinical pathways recommended dosage (75 mg/kg/die).

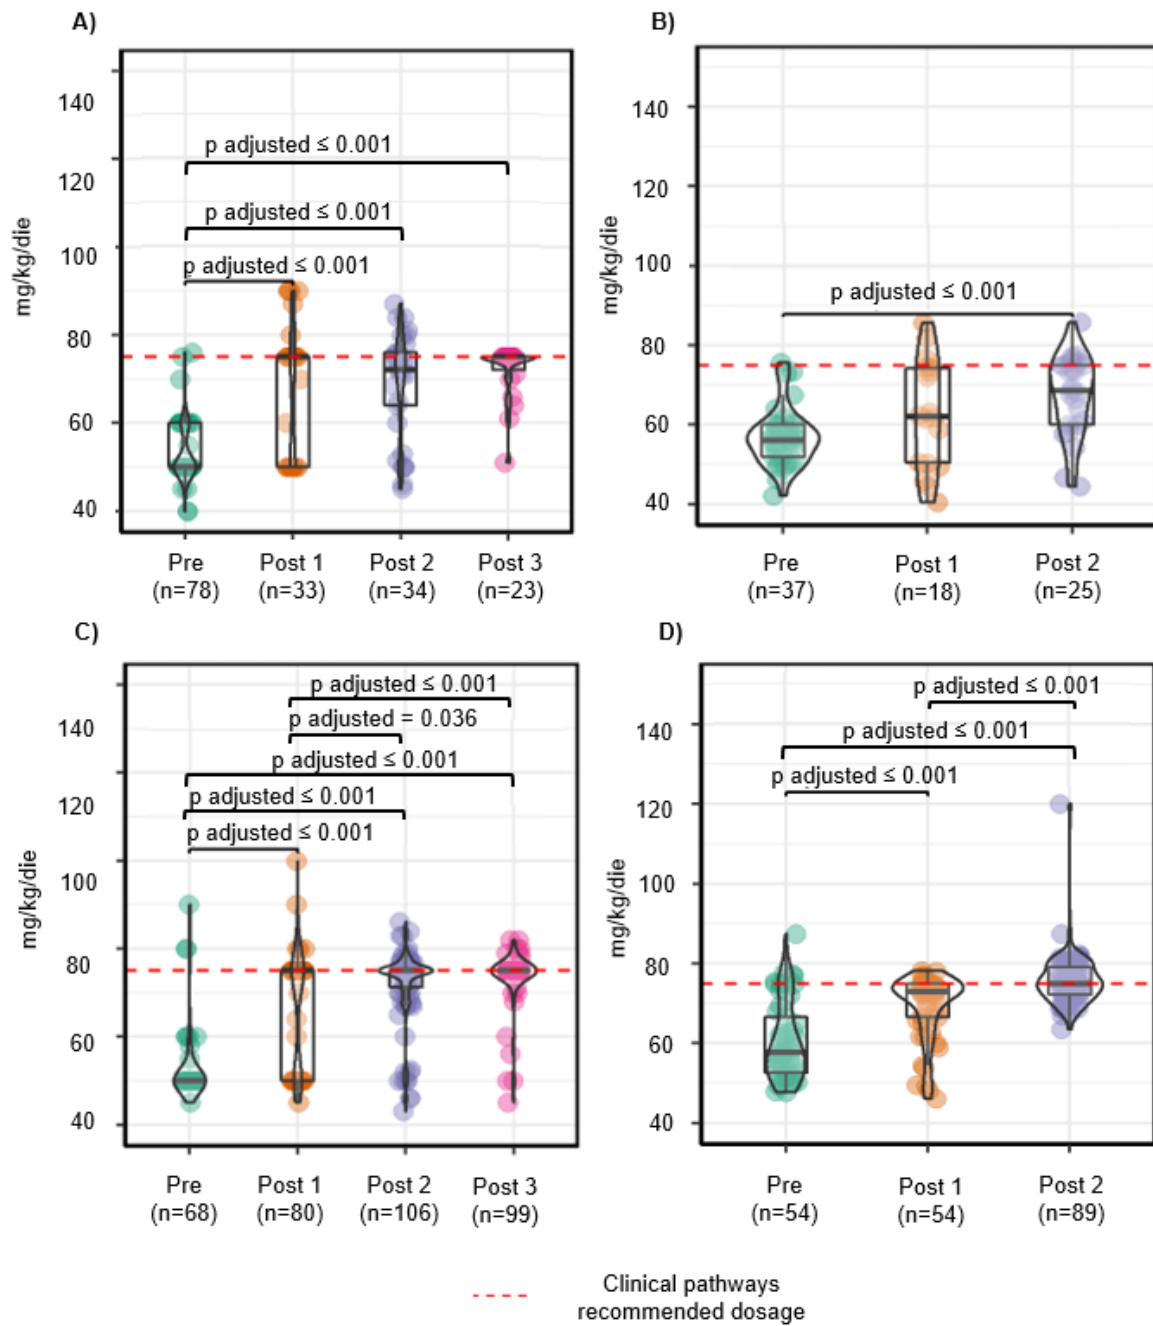

**Figure S4.** Distribution of co-amoxiclav (A, B) and amoxicillin (C, D) dosage for non-complicated acute otitis media among different periods in Centre A (A, C) and Centre B (B, D) with pairwise comparison. The dots represent the granular data, horizontal lines are median and IQR; whiskers extend to the minimum and maximum within 1.5 times the IQR. Violin plots present quantifications. The dotted red line represents the clinical pathways recommended dosage (75 mg/kg/die).

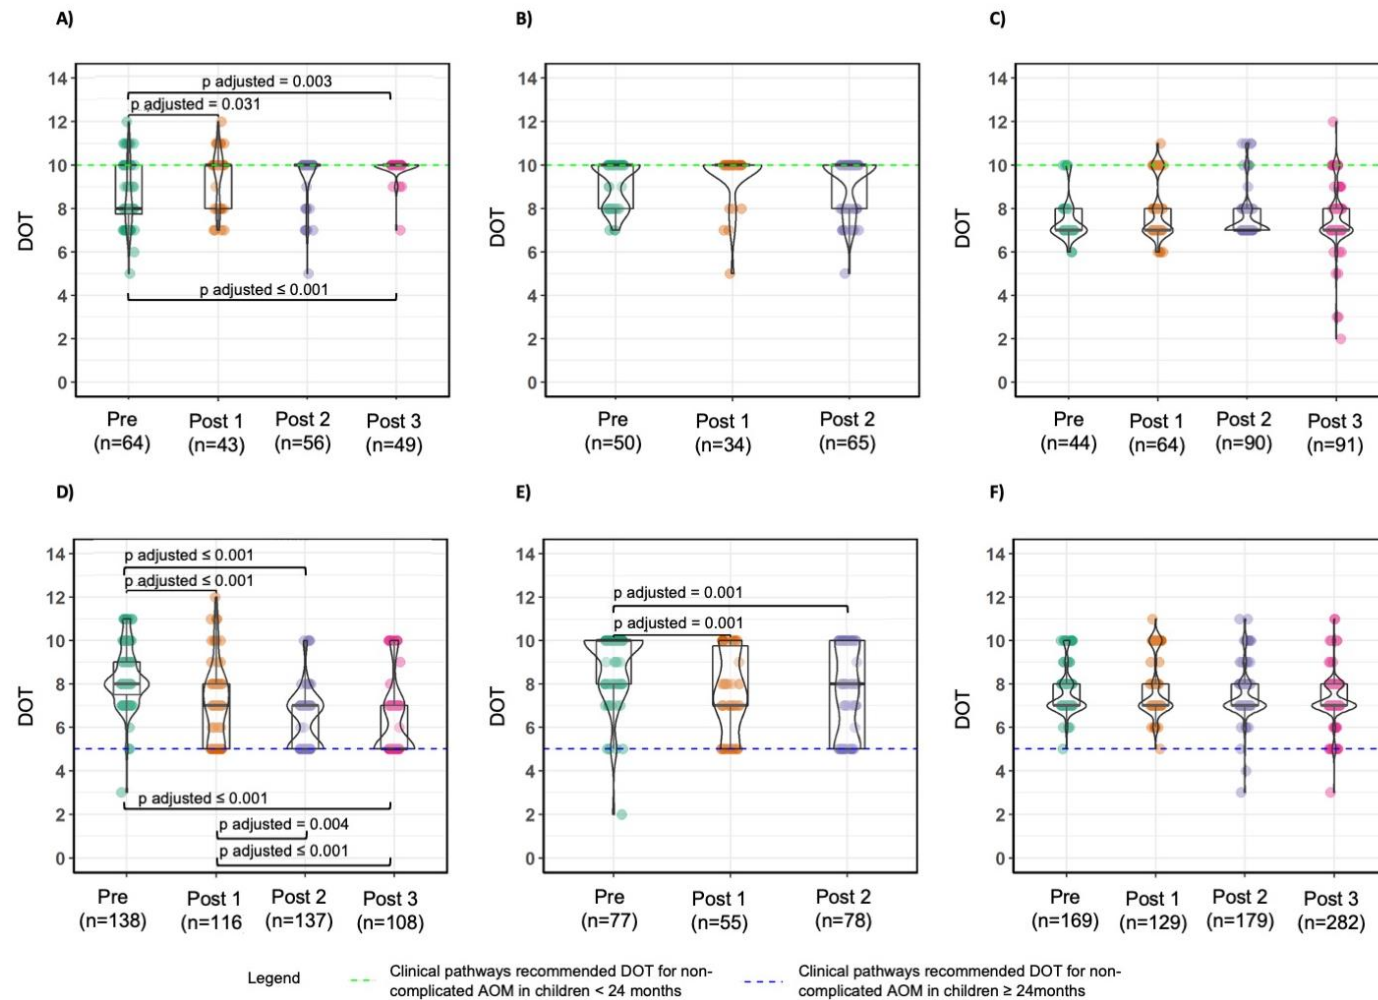

**Figure S5** Distribution of days of therapy (DOT) for acute otitis media in the different periods in Centre A (A, D), Centre B (B, E) and Centre C (C, F) stratified by age class (<24 months: A, B, C; ≥24 months: D, E, F) with pair wise comparison. The dots represent the granular data, horizontal lines are median and IQR; whiskers extend to the minimum and maximum within 1.5 times the IQR. Violin plots present quantifications. The dotted green line represents clinical pathways recommended DOT for AOM in children < 24 months while the dotted blue line represents clinical pathways recommended DOT for complicated and non-complicated AOM in children >24 months.
